# Supplementary material
Source: publisher figshare collection journal article supplement (https://diabetesjournals.figshare.com/ndownloader/files/31910243)
Supplement: Supplementary file 1 [file 31910243]

## Sheet: Clinical Data
Electronic supplementary material Table 1 Clinical and clinicopathological data of type 2 diabetic patients with and without colorectal cancer, colorectal cancer patients and healthy individuals as controls.
				Type 2 Diabetes		Medication (treatment)			TNM staging				Lifestyle risk factors and potential and confounding factors
	Code number	Gender*	Age (years)	Duration (years)**	Date of diagnosis	T2D	Statin	Degree of tumor differentiation	Tumor (T)	Nodes (N)	Metastasis (M)	Tumor Location	(obesity, other diseases…)***
Control	CT1	F	42	-	-	-			-	-	-		None
	CT2	M	50	-	-	-			-	-	-		None
	CT3	F	24	-	-	-			-	-	-		None
	CT4	F	38	-	-	-			-	-	-		None
	CT5	F	55	-	-	-			-	-	-		None
	CT6	M	44	-	-	-			-	-	-		Obesitiy, BMI: 30
	CT7	F	47	-	-	-			-	-	-		None
	CT8	F	30	-	-	-			-	-	-		None
	CT9	F	46	-	-	-			-	-	-		Obesity, BMI: 33
	CT10	F	27	-	-	-			-	-	-		None
Type 2 diabetic patients (T2D)	D1	F	61	5	2013-07-04	Metformin. There is a treatment that increases insulin levels, but it is not indicated which is.	Yes		0	-	-		Obesity. BMI: 36.52
	D2	F	73	23	1995	Insulin (Novomix) + metformin + dapagliflozin	Yes		-	-	-		None
	D3	M	69	12	2006	Metformin + dapagliflozin + dulaglutide	Yes		-	-	-		None
	D4	M	69	17	2001	Insulin (Novomix) + metformin + dapagliflozin	-		-	-	-		None
	D5	M	46	11	2007	Insulin (Toujeo + Novorapid) + Meformin + Dapagliflozin	Yes		-	-	-		None
	D6	M	61	7	2011-04-23	Metformin. And there is another treatment that lowers glucose levels, but what it is is not indicated	Yes		0	-	-		Morbid obesity BMI: 43.12, Surgery: Gastric Bypass
	D7	M	73	28	1990	Insulin (Toujeo + Humalog) + metformin	Yes		-	-	-		None
	D8	M	76	21	1997	Insulin( glulisine) + vildagliptin	Yes		-	-	-		None
	D9	F	54	5	2013-12-02	Diet	Yes		0	-	-		Morbid obesity BMI: 54.78. Surgery: Gastric Bypass
	D10	M	42	2	2016	-	-		-	-	-		None
Colorectal cancer (CRC) patients	CRC1	F	69	-	-	-	Yes	Poorly differentiated	2	N1c	M0	right-sided CRC	None
	CRC2	F	70	-	-	-	Yes	Moderately differentiated	3	N0	M0	sigmoid colon	None
	CRC3	M	58	-	-	-	Yes	Well differentiated	4	N1a	M0	left-sided CRC	None
	CRC4	M	50	-	-	-	Yes	Well differentiated	3	N0	M0	sigmoid colon	None
	CRC5	M	67	-	-	-	-	Poorly differentiated	3	N0	M0	right-sided CRC	None
	CRC6	F	54	-	-	-	Yes	Moderately differentiated	3	N0	M0	sigmoid colon	None
	CRC7	M	86	-	-	-	-	Well differentiated	2	N0	M0	Rectum	None
	CRC8	M	79	-	-	-	Yes	Poorly differentiated	3	N1c	M0	right-sided CRC	None
	CRC9	M	78	-	-	-	-	Moderately differentiated	4	N0	M0	sigmoid colon	None
	CRC10	M	81	-	-	-	-	Moderately differentiated	4	N0	M0	sigmoid colon	None
Type 2 diabetic patients with colorectal cancer (T2D+CRC)	CRC+D1	M	81	13	01/01/2004	Metformin	-	Moderately differentiated	2	N0	M0	Rectum	None
	CRC+D2	M	72	10	27/02/2007	Saxagliptin	Yes	NA	2	N0	M0	sigmoid colon	None
	CRC+D3	M	57	1	2017-10-17	Metformin	Yes	Poorly differentiated	4	N0	M0	sigmoid colon	None
	CRC+D4	F	64	2	2015-04-10	Metformin + vildagliptin	Yes	Well differentiated	4	N1a	M0	sigmoid colon	None
	CRC+D5	F	61	14	2004-08-23	Metformin. There is a treatment that increases insulin levels, but it is not indicated which is.	Yes	Poorly differentiated	3	N2a	M0	sigmoid colon	None
	CRC+D6	M	65	1	08/03/2017	Metformin	Yes	Well differentiated	2	N0	M0	right-sided CRC	None
	CRC+D7	F	68	2	06/04/2016	Metformin	Yes	Poorly differentiated	2	N1c	M0	right-sided CRC	None
	CRC+D8	F	69	7	2017-02-15	Metformin	Yes	Poorly differentiated	NA	NA	NA	NA	None
*M, male. F, female.
**Until blood sample collection
*** BMI was only indicated by clinicians when obesity or morbid obesity cofound factors were observed in patient or control individuals.
NA, not available
